# Supplementary material for: Dentary Morphological Variation in Clevosaurus brasiliensis (Rhynchocephalia, Clevosauridae) from the Upper Triassic of Rio Grande do Sul, Brazil
Source: PLoS One. 2015 Mar 20;10(3):e0119307. doi: 10.1371/journal.pone.0119307 (PMC4368672; doi:10.1371/journal.pone.0119307)
Supplement: S5 Table — (XLS) [file pone.0119307.s006.xls]

## Sheet: Planilha1
S5 Table. Importance of components (N=10)
	Standard deviation	Proportion of variance	Cumulative proportion
PC1	0.09977	0.66487	0.66487
PC2	0.05131	0.17587	0.84074
PC3	0.03577	0.08548	0.92622
PC4	0.0239	0.03816	0.96438
PC5	0.01756	0.02061	0.98498
PC6	0.01083	0.00784	0.99282
PC7	0.009025	0.00544	0.99826
PC8	0.004695	0.00147	0.99973
PC9	0.002004	0.00027	1
PC10	4.682e-17	0	1
